# Supplementary material
Source: Springer Nature journal article supplement (https://www.springermedizin.de/resource/supplementary/12958_2010_839_MOESM10_ESM.pdf/9568978)
Supplement: MOESM10 [file 9568978]

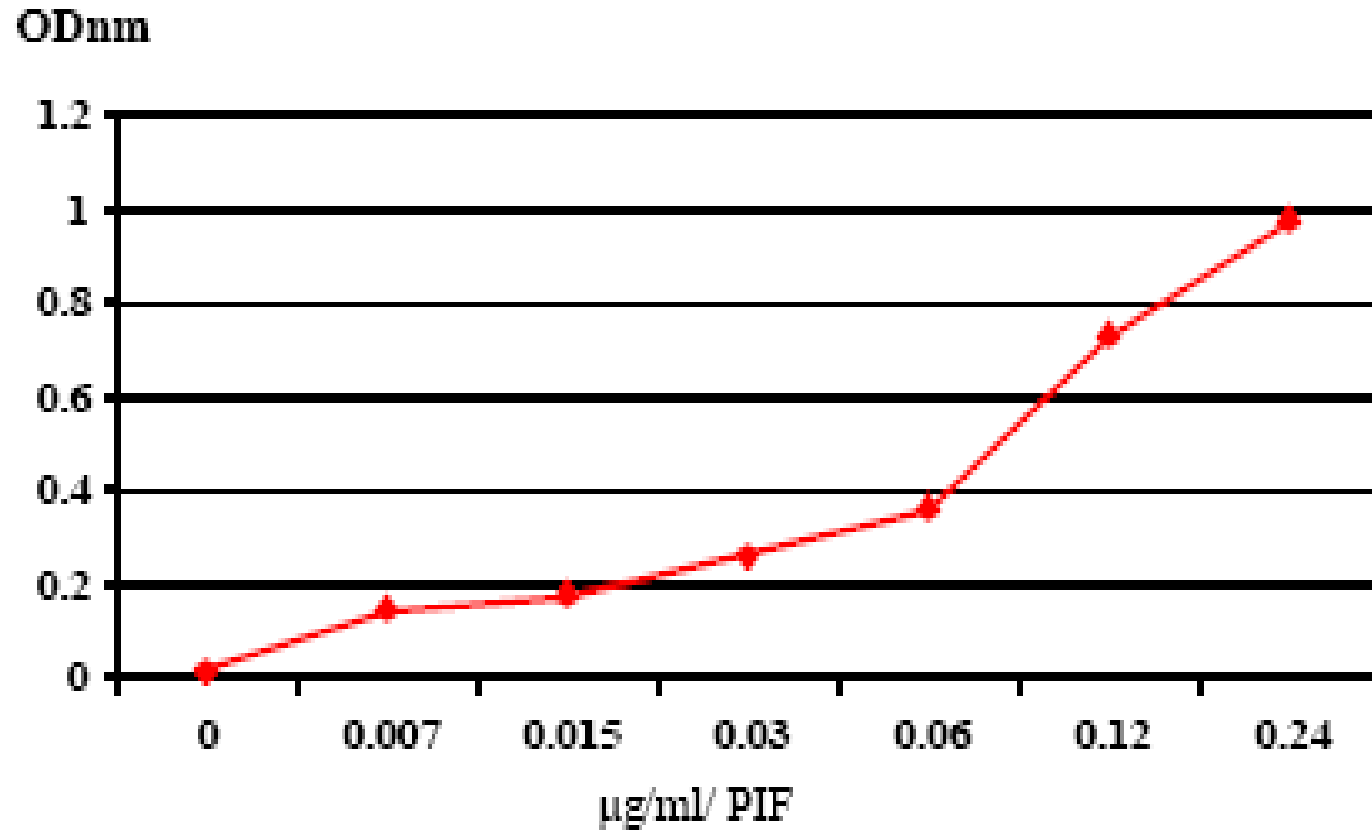

Sandwich ELISA STD. A standard curve was generated by using different concentrations of sPIF. The ELISA method was described in the methods section.

Figure S1
